# Supplementary material for: A ternary ZnO/ZnS/MoS2 composite as a reusable SERS substrate derived from the polyoxomolybdate/ZIF-8 host–guest framework
Source: Royal Society of Chemistry journal article supplement (doi:10.1039/c9tc02967b), 2019-01-01
Supplement: c9tc02967b1.pdf [file c9tc02967b1.pdf]

## *Supporting Information*

### **A new ternary ZnO/ZnS/MoS<sub>2</sub> SERS substrate derived from polyoxomolybdate/ZIF-8 host-guest framework**

Di Yin,<sup>a</sup> Ming-Liang Wang,<sup>a</sup> Ying-Zi Wang,<sup>a</sup> Xun Hu,<sup>a</sup> Bo Liu,<sup>b</sup> Hong Liu,<sup>\*a,c</sup> Lulu Ma,<sup>a</sup> and Guang-Gang Gao<sup>\*a,c</sup>

a. School of Materials Science and Engineering, University of Jinan, Jinan, 250022, China. E-mail: mse\_liuh@ujn.edu.cn.; mse\_gaogg@ujn.edu.cn.

b. Key Laboratory of Preparation and Application of Environmental Friendly Materials, the Ministry of Education, Jilin Normal University, Siping, 136000, China .

c. College of Pharmacy, Jiamusi University, Jiamusi 154007, China.

E-mail: mse\_liuh@ujn.edu.cn; mse\_gaogg@ujn.edu.cn

## The calculation method of the enhancement factor (EF)

The EF of ZnMoNCs substrate is calculated according to the following equation:

$$\begin{aligned} \text{EF} &= (I_{\text{SERS}}/I_{\text{NR}}) \times (N_{\text{NR}}/N_{\text{SERS}}) \\ &= (I_{\text{SERS}}/I_{\text{NR}}) \times [(S_{\text{laser}} \times h \times C_{\text{NR}} \times N_{\text{A}}) / (S_{\text{laser}}/S_{\text{MPY}})] \end{aligned}$$

Where  $I_{\text{SERS}}$  and  $I_{\text{NR}}$  are the intensities of 4-MPY in surface enhanced Raman and Raman spectra respectively;  $N_{\text{SERS}}$  and  $N_{\text{NR}}$  represent the corresponding number of molecules in the surface enhanced Raman spectra and Raman spectra respectively.  $C_{\text{NR}}$  is the corresponding concentration of 4-MPY used in the Raman spectra, and here  $C_{\text{NR}}$  is 0.5 mol/L.  $h$  is the effective layer depth within which each 4-MPY molecule yields the same contribution to the Raman signal as those localized in the ideally focused plane and here  $h$  is calculated to be 17.88  $\mu\text{m}$ .  $S_{\text{laser}}$  is the area of laser focused on the sample (here, laser diameter is 1  $\mu\text{m}$ );  $S_{\text{MPY}}$  is the area of per 4-MPY molecule.  $N_{\text{A}}$  is the Avogadro constant. The intensity of the band at 1023  $\text{cm}^{-1}$  is used to calculate the value of the EF. The ratio of intensity ( $I_{\text{SERS}}/I_{\text{NR}}$ ) is about 70 on the basis of the spectra shown in Fig 4. The value of EF is estimated to be around  $1.4 \times 10^8$ .

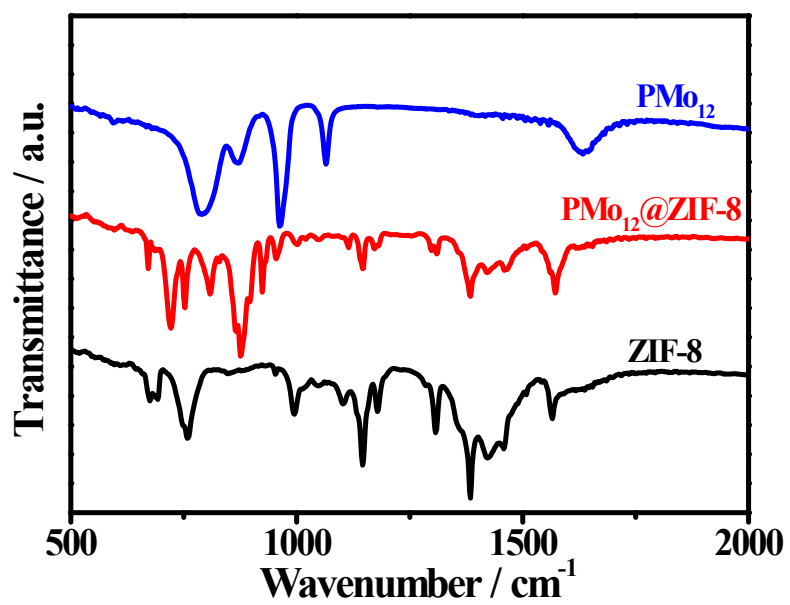

Fig. S1 FTIR spectra of ZIF-8 and PMo<sub>12</sub>@ZIF-8.

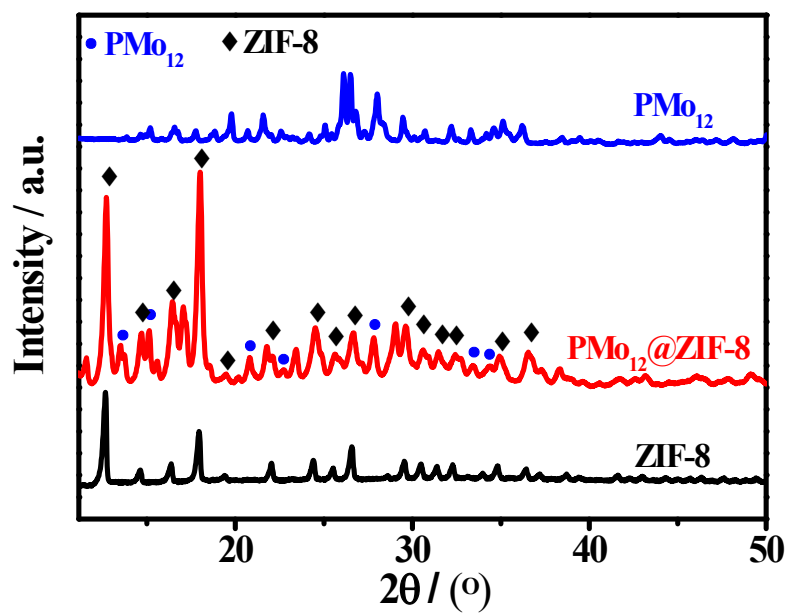

Fig. S2 XRD patterns of PMo<sub>12</sub>, ZIF-8 and PMo<sub>12</sub>@ZIF-8.

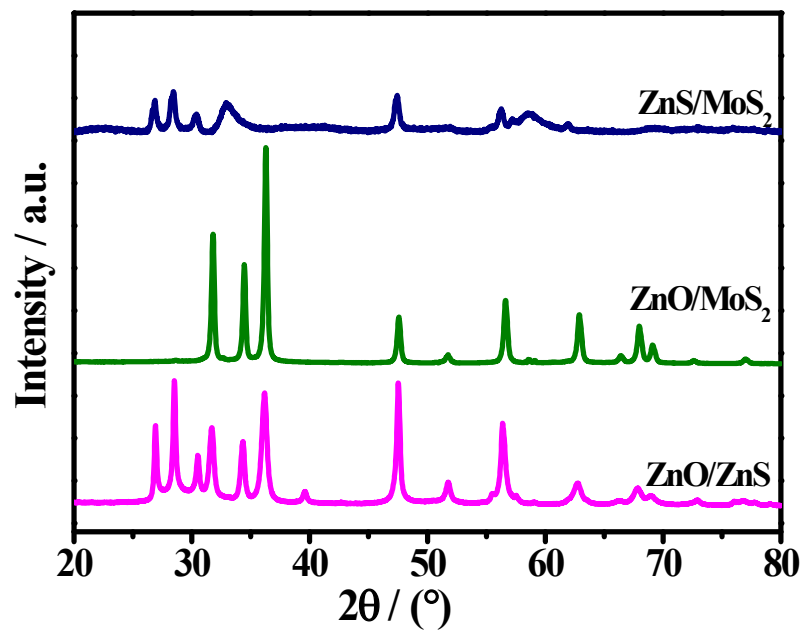

Fig. S3 XRD patterns of ZnO/ZnS, ZnO/MoS<sub>2</sub> and ZnS/MoS<sub>2</sub>.

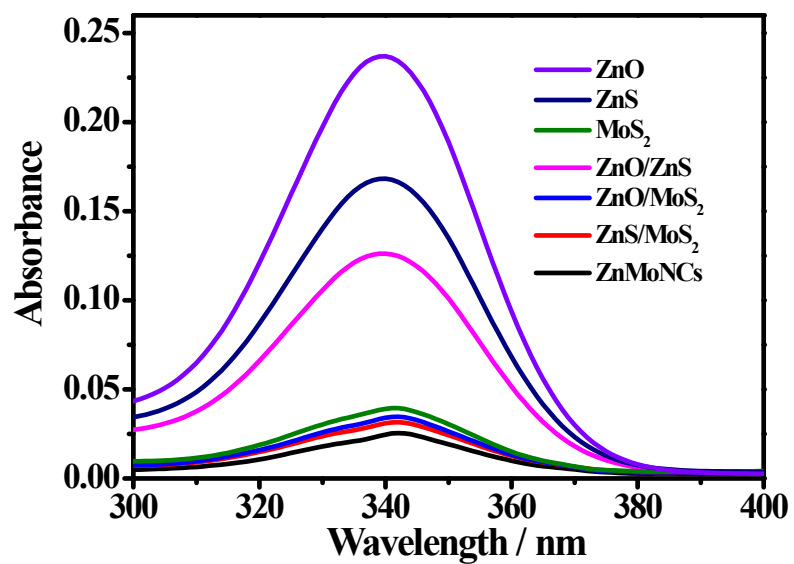

**Fig. S4** UV-vis absorption spectra of residual solution after adsorption of 4-MPY ( $1 \times 10^{-3}$  M) on different samples.

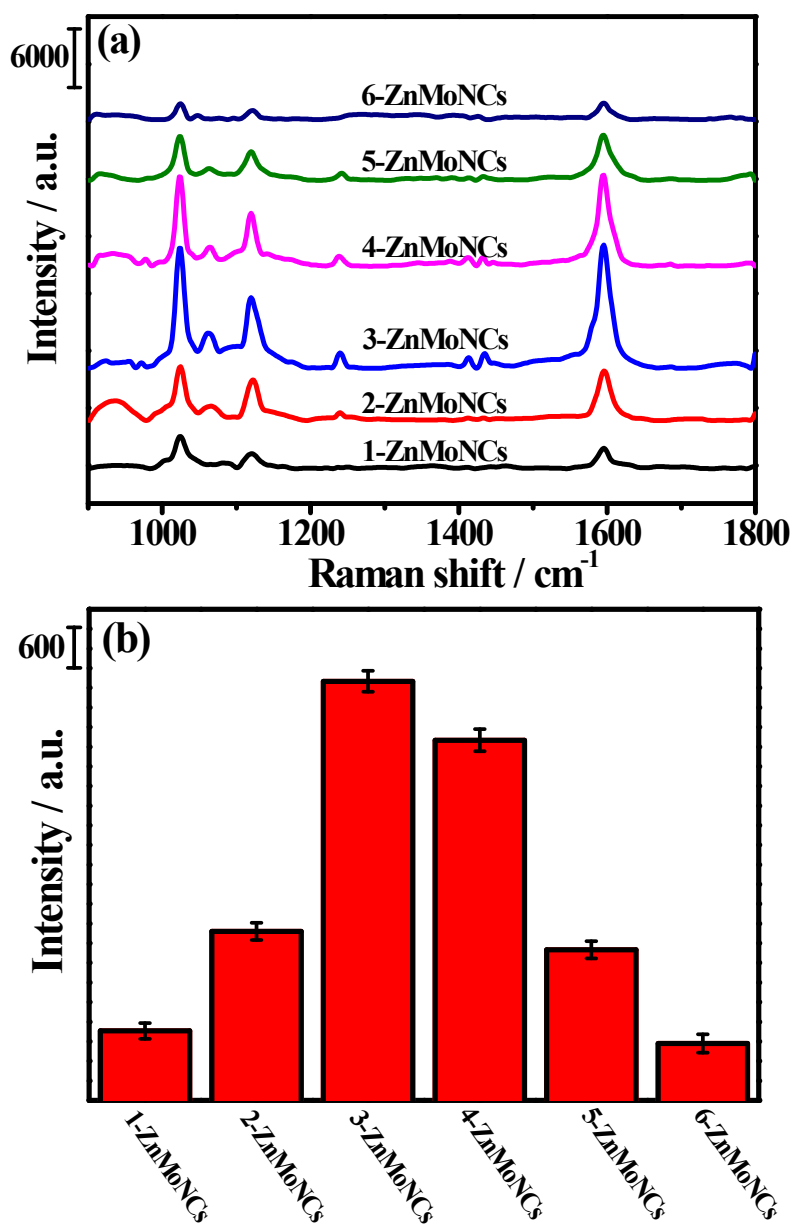

**Fig. S5** (a) SERS spectra of 4-MPY adsorbed on different ZnMoNCs substrates; (b) the histogram of the Raman intensity of 4-MPY at 1023 cm<sup>-1</sup> on different ZnMoNCs substrates (the error bars indicate the standard deviations from five measurements).

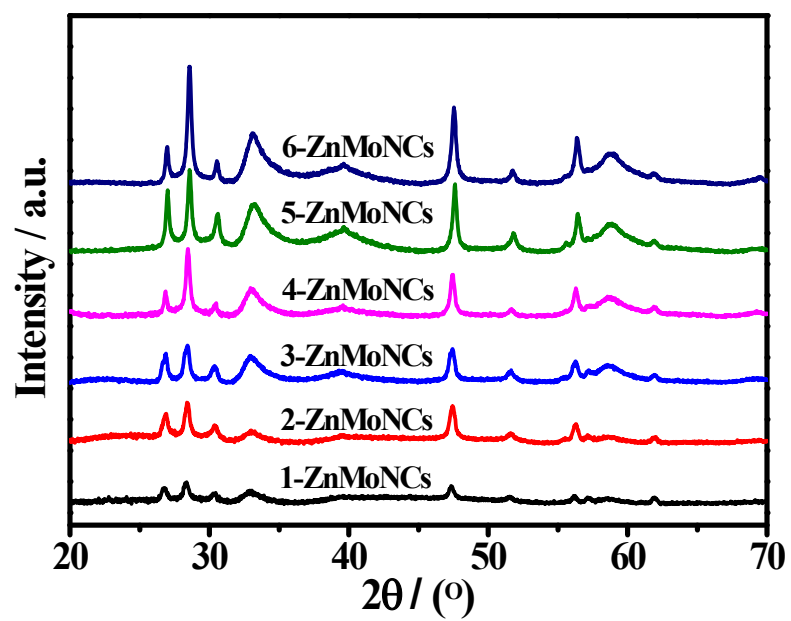

Fig. S6 XRD patterns of the different ZnMoNCs substrates.



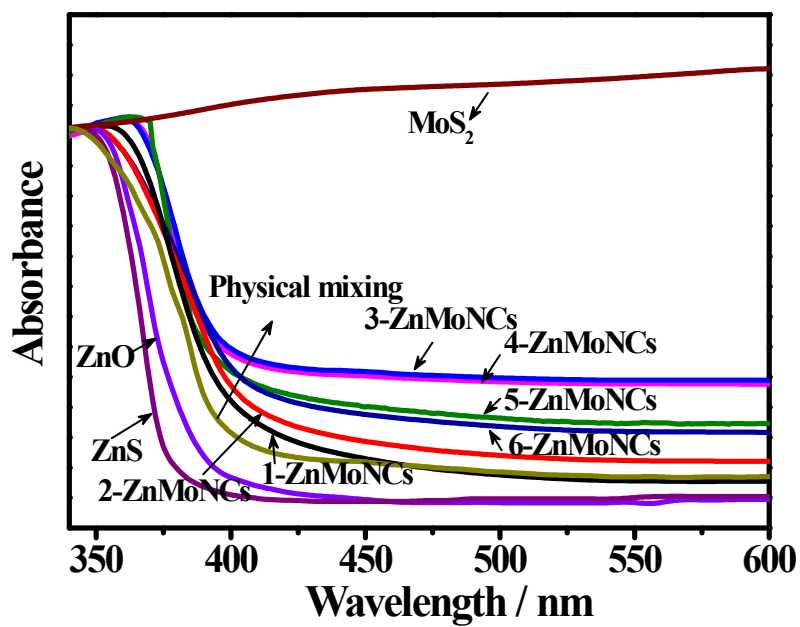

**Fig. S7** UV-vis DRS spectra of the different ZnMoNCs substrates (EDS analyses for Mo elements are 7.7%, 10.1%, 21.4%, 20.6%, 15.8% and 14.7% for 1-ZnMoNCs, 2-ZnMoNCs, 3-ZnMoNCs, 4-ZnMoNCs, 5-ZnMoNCs and 6-ZnMoNCs, respectively).

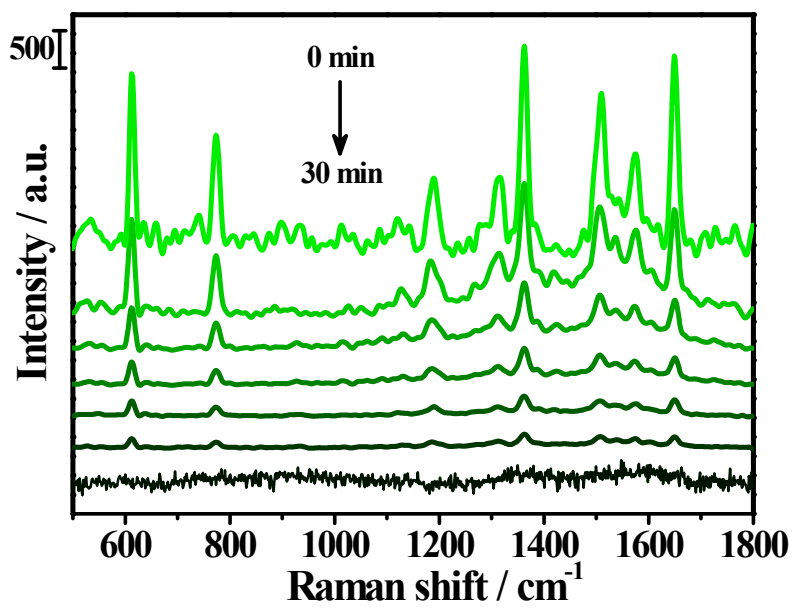

**Fig. S8** SERS spectra of time-dependent catalytic degradation of rhodamine 6G on 3-ZnMoNCs substrate (the time interval is 5 min).

**Table 1** The Raman/SERS shifts ( $\text{cm}^{-1}$ ) and assignments of 4-MPY molecule on 3-ZnMoNCs substrate.

| Raman   |          | SERS   | Assignment                            |
|---------|----------|--------|---------------------------------------|
| Solid   | Solution |        |                                       |
| 987 s   | 992 w    | 1024 s | $a_1$ ring breathing                  |
| 1041 s  | 1046 w   | 1063 w | $a_1$ ring breathing/ $\beta_{(C-H)}$ |
| 1198 m  | 1100 w   |        | $9a_1 \beta_{(CH)}/\delta_{(NH)}$     |
|         |          | 1120 m | $12a_1$ ring breathing/ $\nu_{(C-S)}$ |
| 1246 vw | 1277 w   | 1239 w | $9a_1 \beta_{(CH)}$                   |
| 1396 m  |          | 1412 w | $\nu_{(C-N-C)}$                       |
| 1457 vw | 1458 w   | 1435 w | $19a_1 \nu_{(C=C/C=N)}$               |
| 1616 w  |          | 1593 s | $b_2 \nu_{(C=C)}$                     |

v: stretching vibration,  $\beta$ : rocking vibration,  $\delta$ , bending vibrations; s: strong, m: medium, w: weak, vw: very weak.

**Table 2** The band gap (E<sub>g</sub>) values of different materials.

| <b>Samples</b>   | <b>Band gap / eV</b> |
|------------------|----------------------|
| ZnO              | 3.24                 |
| ZnS              | 3.72                 |
| MoS <sub>2</sub> | ---                  |
| Physical mixing  | 3.09                 |
| 1-ZnMoNCs        | 3.02                 |
| 2-ZnMoNCs        | 2.98                 |
| 3-ZnMoNCs        | 2.96                 |
| 4-ZnMoNCs        | 2.95                 |
| 5-ZnMoNCs        | 2.94                 |
| 6-ZnMoNCs        | 2.90                 |
